# Supplementary material for: Evolutionary Analyses Reveal Diverged Patterns of SQUAMOSA Promoter Binding Protein-Like (SPL) Gene Family in Oryza Genus
Source: Front Plant Sci. 2019 May 8;10:565. doi: 10.3389/fpls.2019.00565 (PMC6517846; doi:10.3389/fpls.2019.00565)
Supplement: TABLE S4 — Segmentally and tandemly duplicated Oryza SPL gene pairs. [file Table_4.xlsx]

## Sheet: Sheet1
Table S4 Segmentally and tandemly duplicated Oryza gene pairs
Organism	Gene Name	Gene ID	Gene Name	Gene ID	Duplication Type
Oryza sativa ssp. Japonica	OsSPL3	LOC_Os02g04680	OsSPL12	LOC_Os06g49010	Segmental duplication
	OsSPL4	LOC_Os02g07780	OsSPL11	LOC_Os06g45310	Segmental duplication
	OsSPL5	LOC_Os02g08070	OsSPL10	LOC_Os06g44860	Segmental duplication
	OsSPL14	LOC_Os08g39890	OsSPL17	LOC_Os09g31438	Segmental duplication
	OsSPL16	LOC_Os08g41940	OsSPL18	LOC_Os09g32944	Segmental duplication
Oryza nivara	OnSPL4	ONIVA02G03070	OnSPL12	ONIVA06G29160	Segmental duplication
	OnSPL5	ONIVA02G05960	OnSPL11	ONIVA06G27990	Segmental duplication
	OnSPL14	ONIVA08G22610	OnSPL17	ONIVA09G15400	Segmental duplication
	OnSPL16	ONIVA08G24550	OnSPL18	ONIVA09G16860	Segmental duplication
Oryza rufipogon	OrSPL15	ORUFI08G24030	OrSPL17	ORUFI09G16990	Segmental duplication
	OrSPL3	ORUFI02G03180	OrSPL11	ORUFI06G28570	Segmental duplication
	OrSPL4	ORUFI02G05750	OrSPL10	ORUFI06G25590	Segmental duplication
	OrSPL5	ORUFI02G05950	OrSPL9	ORUFI06G25170	Segmental duplication
	OrSPL13	ORUFI08G22440	OrSPL16	ORUFI09G15960	Segmental duplication
Oryza barthii	ObSPL4	OBART02G03260	ObSPL11	OBART06G26610	Segmental duplication
	ObSPL13	OBART08G20010	ObSPL15	OBART09G14800	Segmental duplication
	ObSPL1	OBART01G12250	ObSPL2	OBART01G12270	Tandem duplication
Oryza glumipatula	OgluSPL15	OGLUM08G22810	OgluSPL17	OGLUM09G16320	Segmental duplication
	OgluSPL3	OGLUM02G05530	OgluSPL10	OGLUM06G25070	Segmental duplication
	OgluSPL4	OGLUM02G05810	OgluSPL9	OGLUM06G24700	Segmental duplication
	OgluSPL13	OGLUM08G21260	OgluSPL16	OGLUM09G15430	Segmental duplication
Oryza glaberrima	OglaSPL3	ORGLA02G0030600	OglaSPL11	ORGLA06G0222300	Segmental duplication
	OglaSPL4	ORGLA02G0051400	OglaSPL10	ORGLA06G0199900	Segmental duplication
	OglaSPL5	ORGLA02G0053800	OglaSPL9	ORGLA06G0196600	Segmental duplication
	OglaSPL12	ORGLA08G0176500	OglaSPL15	ORGLA09G0114000	Segmental duplication
